# Supplementary material
Source: publisher figshare collection journal article supplement (https://sage.figshare.com/ndownloader/files/16587434)
Supplement: Supplementary file 1 [file 16587434]

**SUPPLEMENTARY TABLE.** Consolidated Criteria for Reporting Qualitative Studies Checklist

| Item                                           | Guide Questions/ Description                                                                              | Response                                                                                                                                                                                                                                                                                                                               |
|------------------------------------------------|-----------------------------------------------------------------------------------------------------------|----------------------------------------------------------------------------------------------------------------------------------------------------------------------------------------------------------------------------------------------------------------------------------------------------------------------------------------|
| <b>Domain 1: Research Team and Reflexivity</b> |                                                                                                           |                                                                                                                                                                                                                                                                                                                                        |
| <b>Personal characteristics</b>                |                                                                                                           |                                                                                                                                                                                                                                                                                                                                        |
| 1. Interviewer/ facilitator                    | Which author/s conducted the interview or focus group?                                                    | St. Romain<br>Barbaree                                                                                                                                                                                                                                                                                                                 |
| 2. Credentials                                 | What were the researchers' credentials (eg Phd, MD)?                                                      | Staiano- PhD, MPP<br>St. Romain- BS<br>Allen- BS, MBA<br>Barbaree- MBA student                                                                                                                                                                                                                                                         |
| 3. Occupation                                  | What was their occupation at the time of the study?                                                       | Staiano- Assistant Professor<br>St. Romain- Research Specialist<br>Allen- Outreach Officer<br>Barbaree- Policy Intern                                                                                                                                                                                                                  |
| 4. Sex                                         | Was the researcher male or female?                                                                        | Staiano- Female<br>St. Romain- Female<br>Allen- Male<br>Barbaree- Female                                                                                                                                                                                                                                                               |
| 5. Experience and training                     | What experience or training did the researcher have?                                                      | Staiano- previously administered/oversaw 16 focus groups<br>St. Romain- previously administered and oversaw 4 focus groups and attended focus group training facilitated by national expert on 11/2016<br>Barbaree- previously co-moderated 2 focus groups and attended focus group training facilitated by national expert on 11/2016 |
| <b>Relationship with participants</b>          |                                                                                                           |                                                                                                                                                                                                                                                                                                                                        |
| 6. Relationship established                    | Was a relationship established prior to study commencement?                                               | The focus group participants were recruited through ECE where relationships were already established.                                                                                                                                                                                                                                  |
| 7. Participant knowledge of the interviewer    | What did the participant know about the researcher (e.g. personal goals, reasons for doing the research)? | Participants were told the purpose of focus groups was to gather parent/director perspectives on physical activity and screen-time behaviors in preschool aged children.                                                                                                                                                               |

|                                 |                                                                                                                                                            |                                                                                                                                                              |
|---------------------------------|------------------------------------------------------------------------------------------------------------------------------------------------------------|--------------------------------------------------------------------------------------------------------------------------------------------------------------|
| 8. Interviewer characteristics  | What characteristics were reported about the interviewer/facilitator (e.g. bias, assumptions, reasons, and interests in the research topic)?               | None                                                                                                                                                         |
| <b>Domain 2: Study Design</b>   |                                                                                                                                                            |                                                                                                                                                              |
| <b>Theoretical framework</b>    |                                                                                                                                                            |                                                                                                                                                              |
| 9. Methodological orientation   | What methodological orientation was stated to underpin the study (e.g. grounded theory, discourse analysis, ethnography, phenomenology, content analysis)? | Content and thematic analysis                                                                                                                                |
| <b>Participant selection</b>    |                                                                                                                                                            |                                                                                                                                                              |
| 10. Sampling                    | How were participants selected (e.g. purposive, convenience, consecutive, snowball)?                                                                       | Convenience sampling                                                                                                                                         |
| 11. Method of approach          | How were participants approached (e.g. face-to-face, telephone, email, mail)?                                                                              | Face-to-face, telephone, flyer distribution, emails                                                                                                          |
| 12. Sample size                 | How many participants were in the study?                                                                                                                   | 28                                                                                                                                                           |
| 13. Nonparticipation            | How many people refused to participate or dropped out? Reasons?                                                                                            | No participants who attended focus groups refused to consent.                                                                                                |
| <b>Setting</b>                  |                                                                                                                                                            |                                                                                                                                                              |
| 14. Setting of data collection  | Where were the data collected (e.g. home, clinic, workplace)?                                                                                              | 3 focus groups met at local libraries and 1 was conducted at an ECE center.                                                                                  |
| 15. Presence of nonparticipants | Was anyone else present besides the participants and researchers?                                                                                          | In two groups, a child was present with their guardian.                                                                                                      |
| 16. Description of sample       | What are the important characteristics of the sample (e.g. demographic data, date)?                                                                        | See descriptive characteristics (Table 2).                                                                                                                   |
| <b>Data collection</b>          |                                                                                                                                                            |                                                                                                                                                              |
| 17. Interview guide             | Were questions, prompts, and/or guides provided by the authors? Was it pilot tested?                                                                       | Moderators used a script; the script was vetted and approved by the research team.                                                                           |
| 18. Repeat interviews           | Were repeat interviews carried out? If yes, how many?                                                                                                      | No                                                                                                                                                           |
| 19. Audio/visual recording      | Did the researchers use audio or visual recording to collect the data?                                                                                     | Yes, both a video camera and an audio recorder were used to facilitate transcription.                                                                        |
| 20. Field notes                 | Were field notes made during and/or after the interview or focus group?                                                                                    | Some field notes were made but the predominant method of recording was via transcription of the audio recordings so as not to interfere with the discussion. |

|                                        |                                                                                                                                  |                                                                                    |
|----------------------------------------|----------------------------------------------------------------------------------------------------------------------------------|------------------------------------------------------------------------------------|
| 21. Duration                           | What was the duration of the interviews or focus group?                                                                          | Up to 60 minutes of discussion.                                                    |
| 22. Data saturation                    | Was data saturation discussed?                                                                                                   | Yes                                                                                |
| 23. Transcripts returned               | Were transcripts returned to participants for comment and/or correction?                                                         | No                                                                                 |
| <b>Domain 3: Analysis and Findings</b> |                                                                                                                                  |                                                                                    |
| <b>Data analysis</b>                   |                                                                                                                                  |                                                                                    |
| 24. Number of data encoders            | How many data coders coded the data?                                                                                             | 2                                                                                  |
| 25. Description of the coding tree     | Did the authors provide a description of the coding tree?                                                                        | Yes                                                                                |
| 26. Derivation of themes               | Were the themes identified in advance or derived from the data?                                                                  | Major themes were identified in advance, and subthemes were derived from the data. |
| 27. Software                           | What software, if applicable, was used to manage the data?                                                                       | NVivo software (QSR Version 11 Plus, Victoria, Australia)                          |
| 28. Participant checking               | Did participants provide feedback on the findings?                                                                               | No                                                                                 |
| <b>Reporting</b>                       |                                                                                                                                  |                                                                                    |
| 29. Quotations presented               | Were participant quotations presented to illustrate the themes/findings? Was each quotation identified (eg, participant number)? | Yes                                                                                |
| 30. Data and findings consistent       | Was there consistency between the data presented and the findings?                                                               | Yes                                                                                |
| 31. Clarity of major themes            | Were major themes clearly presented in the findings?                                                                             | Yes                                                                                |
| 32. Clarity of minor themes            | Was there a description of diverse cases or discussion of minor themes?                                                          | Yes                                                                                |
